# Supplementary material for: Correlation between Urine N-Terminal Telopeptide and Fourier Transform Infrared Spectroscopy Parameters: A Preliminary Study
Source: J Osteoporos. 2020 Feb 11;2020:5725086. doi: 10.1155/2020/5725086 (PMC7036120; doi:10.1155/2020/5725086)
Supplement: Supplementary Materials — STROBE Statement—checklist of items that should be included in reports of observational studies. [file 5725086.f1.docx]

STROBE Statement—checklist of items that should be included in reports of observational studies

|  | Item No. | Recommendation | Page  No. | Relevant text from manuscript |
| --- | --- | --- | --- | --- |
| **Title and abstract** | 1 | (*a*) Indicate the study’s design with a commonly used term in the title or the abstract | P3 Abstract | L5: The aim of this cross-sectional study… |
| (*b*) Provide in the abstract an informative and balanced summary of what was done and what was found | P3 Abstract |  |
| Introduction | | | |  |
| Background/rationale | 2 | Explain the scientific background and rationale for the investigation being reported | P4 | 1st-2nd paragraphs |
| Objectives | 3 | State specific objectives, including any prespecified hypotheses | P5 | L1: The purpose of this pilot study is to identify |
| Methods | | | |  |
| Study design | 4 | Present key elements of study design early in the paper | P5 | In “patients and samples” section |
| Setting | 5 | Describe the setting, locations, and relevant dates, including periods of recruitment, exposure, follow-up, and data collection | P5 | In “patients and samples” section |
| Participants | 6 | (*a*) *Cohort study*—Give the eligibility criteria, and the sources and methods of selection of participants. Describe methods of follow-up  *Case-control study*—Give the eligibility criteria, and the sources and methods of case ascertainment and control selection. Give the rationale for the choice of cases and controls  *Cross-sectional study*—Give the eligibility criteria, and the sources and methods of selection of participants | P5 | In “patients and samples” section |
| (*b*)*Cohort study*—For matched studies, give matching criteria and number of exposed and unexposed  *Case-control study*—For matched studies, give matching criteria and the number of controls per case |  |  |
| Variables | 7 | Clearly define all outcomes, exposures, predictors, potential confounders, and effect modifiers. Give diagnostic criteria, if applicable | P5-6 | In “patients and samples” section |
| Data sources/ measurement | 8* | For each variable of interest, give sources of data and details of methods of assessment (measurement). Describe comparability of assessment methods if there is more than one group | P5-6 | In “patients and samples” and “FTIR data acquisition and processing”sections |
| Bias | 9 | Describe any efforts to address potential sources of bias | P7-8 | In “other variables and correlation analysis” section |
| Study size | 10 | Explain how the study size was arrived at | NA | Due to explanatory nature of this study |

| Quantitative variables | 11 | Explain how quantitative variables were handled in the analyses. If applicable, describe which groupings were chosen and why | P7-8 | In “other variables and correlation analysis” section |
| --- | --- | --- | --- | --- |
| Statistical methods | 12 | (*a*) Describe all statistical methods, including those used to control for confounding | P8 | In “other variables and correlation analysis” section |
| (*b*) Describe any methods used to examine subgroups and interactions | P8 | In “other variables and correlation analysis” section |
| (*c*) Explain how missing data were addressed | NA |  |
| (*d*) *Cohort study*—If applicable, explain how loss to follow-up was addressed  *Case-control study*—If applicable, explain how matching of cases and controls was addressed  *Cross-sectional study*—If applicable, describe analytical methods taking account of sampling strategy | NA |  |
| (*e*) Describe any sensitivity analyses | NA |  |
| Results | | | | |
| Participants | 13* | (a) Report numbers of individuals at each stage of study—eg numbers potentially eligible, examined for eligibility, confirmed eligible, included in the study, completing follow-up, and analysed | P5,8-9 | In “ patients and samples” of the method section, and “characteristics” of the results section. |
| (b) Give reasons for non-participation at each stage | P9 | In “characteristics” of the results section. |
| (c) Consider use of a flow diagram | NA |  |
| Descriptive data | 14* | (a) Give characteristics of study participants (eg demographic, clinical, social) and information on exposures and potential confounders | P8-9 | In “characteristics” of the results section. |
| (b) Indicate number of participants with missing data for each variable of interest | P8-9 | In “characteristics” of the results section. |
| (c) *Cohort study*—Summarise follow-up time (eg, average and total amount) | NA |  |
| Outcome data | 15* | *Cohort study*—Report numbers of outcome events or summary measures over time | NA |  |
| *Case-control study—*Report numbers in each exposure category, or summary measures of exposure | NA |  |
| Cross-sectional study—Report numbers of outcome events or summary measures | P9-10 | In “ correlations between uNTX  and FTIR parameters” section. |
| Main results | 16 | (*a*) Give unadjusted estimates and, if applicable, confounder-adjusted estimates and their precision (eg, 95% confidence interval). Make clear which confounders were adjusted for and why they were included | P9-10 | In “ Correlations between uNTX and FTIR parameters” section. |
| (*b*) Report category boundaries when continuous variables were categorized | NA |  |
| (*c*) If relevant, consider translating estimates of relative risk into absolute risk for a meaningful time period | NA |  |

| Other analyses | 17 | Report other analyses done—eg analyses of subgroups and interactions, and sensitivity analyses | NA |  |
| --- | --- | --- | --- | --- |
| Discussion | | | | |
| Key results | 18 | Summarise key results with reference to study objectives | P10-12 | The 1st -5th paragraph of the discussion section. |
| Limitations | 19 | Discuss limitations of the study, taking into account sources of potential bias or imprecision. Discuss both direction and magnitude of any potential bias | P13 | The 6th paragraph of the discussion section. |
| Interpretation | 20 | Give a cautious overall interpretation of results considering objectives, limitations, multiplicity of analyses, results from similar studies, and other relevant evidence | P13 | The 6th paragraph of the discussion section and the conclusion section. |
| Generalisability | 21 | Discuss the generalisability (external validity) of the study results | P12-13 | The 5th- 6th aragraph of the discussion section, and the conclusion section. |
| Other information | |  | | |
| Funding | 22 | Give the source of funding and the role of the funders for the present study and, if applicable, for the original study on which the present article is based | P14 | Funding section |

*Give information separately for cases and controls in case-control studies and, if applicable, for exposed and unexposed groups in cohort and cross-sectional studies.

**Note:** An Explanation and Elaboration article discusses each checklist item and gives methodological background and published examples of transparent reporting. The STROBE checklist is best used in conjunction with this article (freely available on the Web sites of PLoS Medicine at http://www.plosmedicine.org/, Annals of Internal Medicine at http://www.annals.org/, and Epidemiology at http://www.epidem.com/). Information on the STROBE Initiative is available at www.strobe-statement.org.
